# Supplementary figures and images for: Defective neuroepithelial cell cohesion affects tangential branchiomotor neuron migration in the zebrafish neural tube
Source: Oxford University Press journal article supplement (doi:10.1242/dev.071233), 2011-09-30

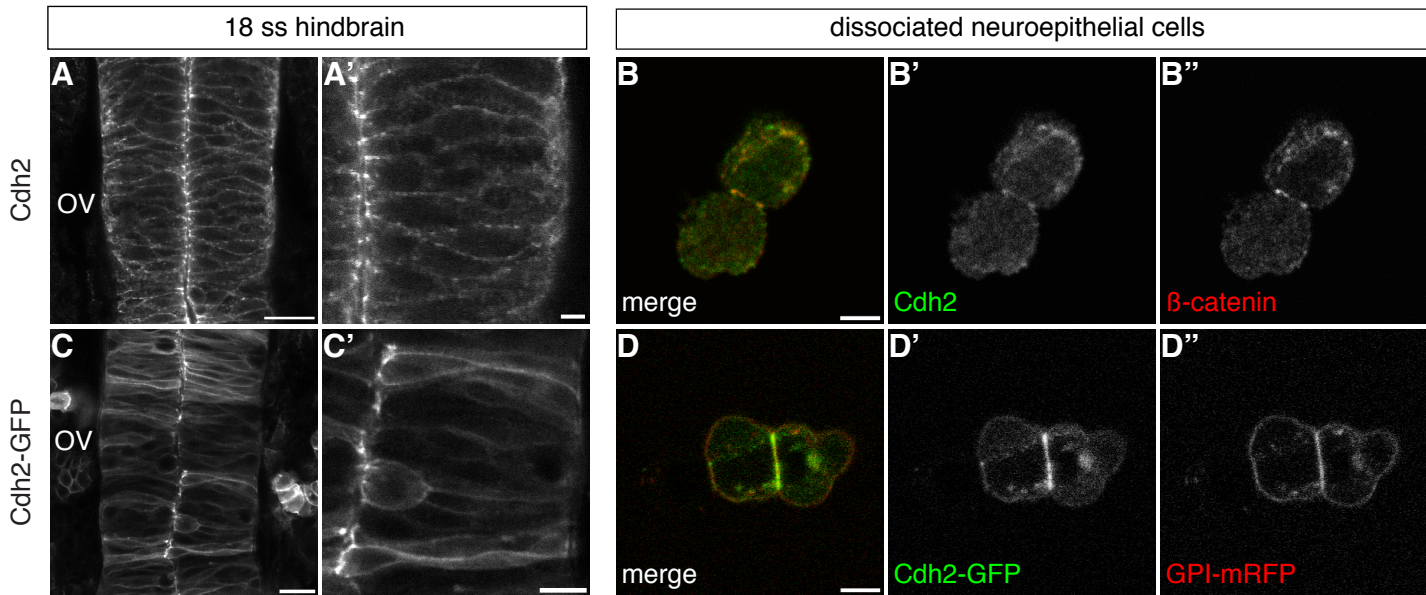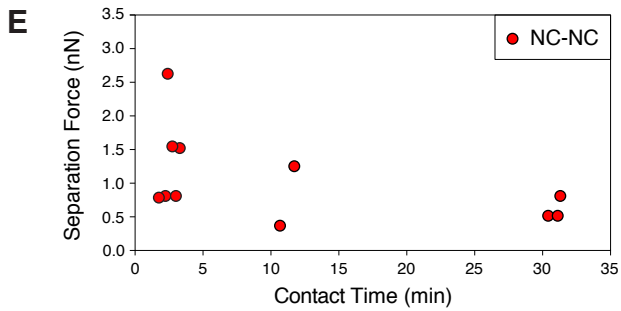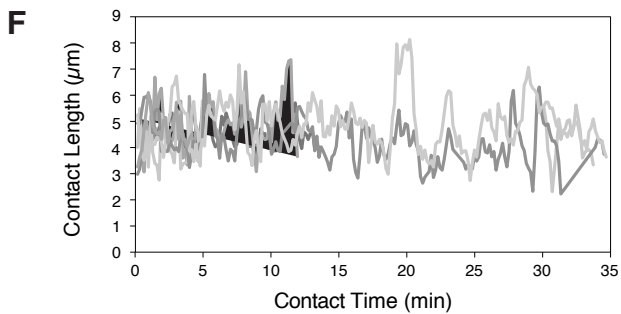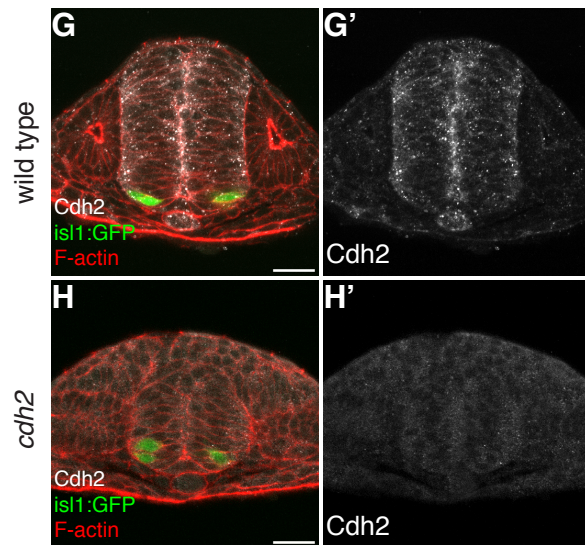

Supplement: dev071233figs1.pdf [file dev071233figs1.pdf]

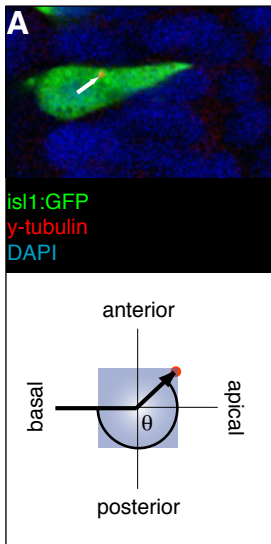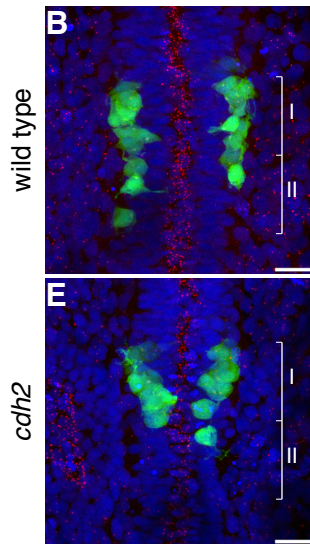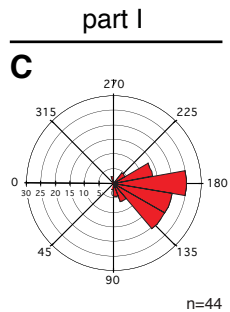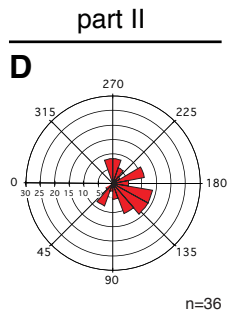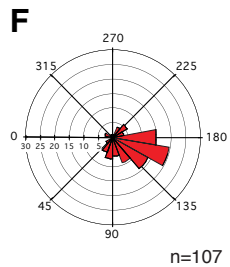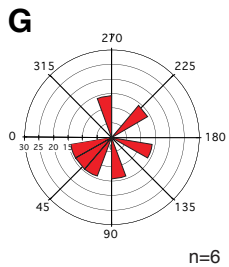

Supplement: dev071233figs2.pdf [file dev071233figs2.pdf]

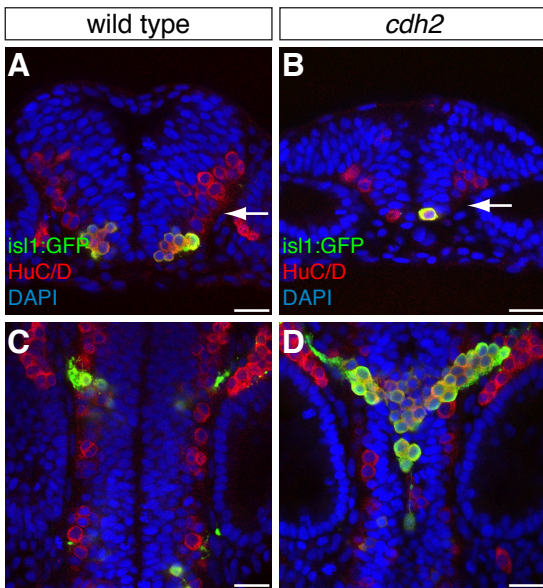

Supplement: dev071233figs3.pdf [file dev071233figs3.pdf]

*cntn2*

wild type

*cdh2*

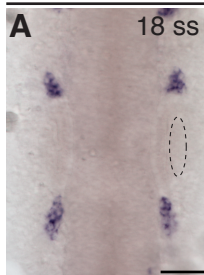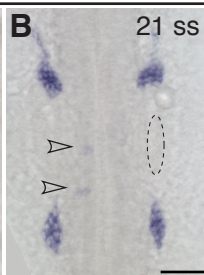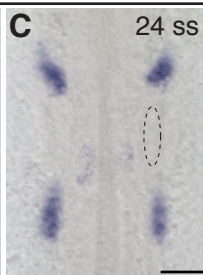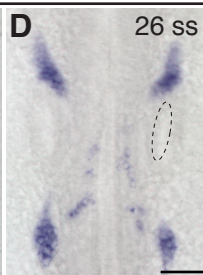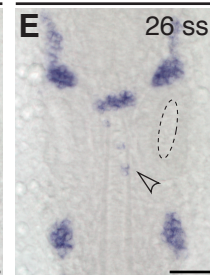

Supplement: dev071233figs4.pdf [file dev071233figs4.pdf]

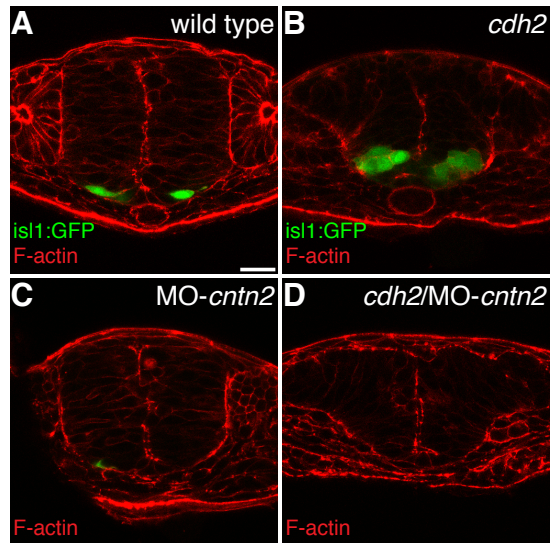

Supplement: dev071233figs5.pdf [file dev071233figs5.pdf]
